# Supplementary material for: Anna, Peter und Lund, der Lese-Rechtschreib-Hund [Anna, Peter and Lund, the dyslexia dog]
Source: Royal Society of Chemistry journal article supplement (doi:10.1039/c4nr05106h), 2011-01-01
Supplement: c4nr05106h1.pdf [file c4nr05106h1.pdf]

Supplementary Information for

**Exfoliated-SnS<sub>2</sub> Restacked on Graphene as High-Capacity,  
High-Rate, and Long-Cycle Life Anode for Sodium Ion Batteries**

Yongchang Liu, Hongyan Kang, Lifang Jiao,\* Chengcheng Chen, Kangzhe Cao,

Yijing Wang and Huatang Yuan

Key Laboratory of Advanced Energy Materials Chemistry (Ministry of Education);

Collaborative Innovation Center of Chemical Science and Engineering (Tianjin);

College of Chemistry, Nankai University, Tianjin 300071, P.R. China

E-mail: [jiaolf@nankai.edu.cn](mailto:jiaolf@nankai.edu.cn)

**Supplementary Figures**

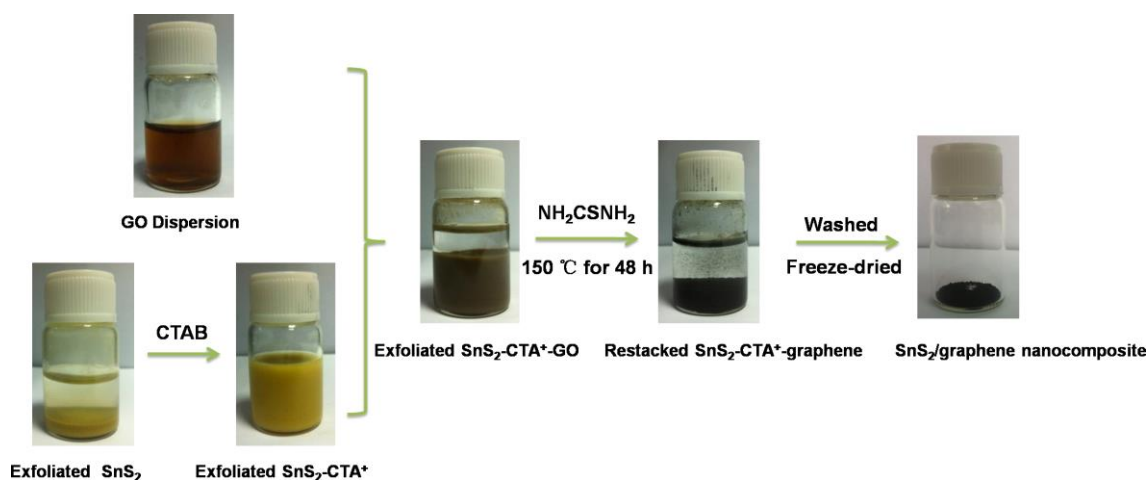

**Scheme S1** Schematic illustration of the fabrication process for SnS<sub>2</sub>/graphene nanocomposite with digital photographs.

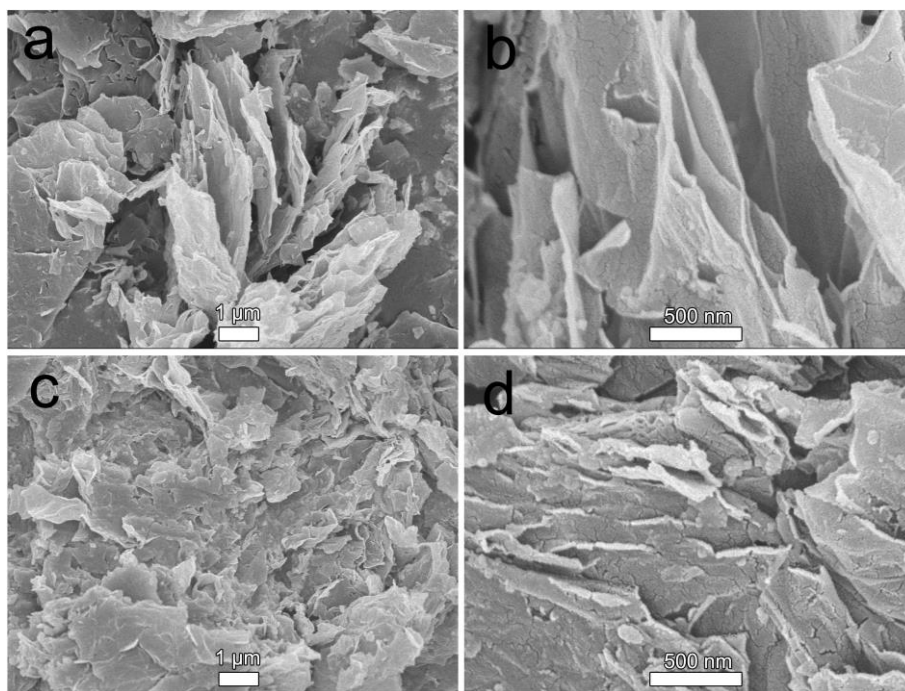

**Fig. S1** SEM images of (a, b)  $\text{SnS}_2/\text{G-10}$  composite, (c, d)  $\text{SnS}_2/\text{G-30}$  composite.

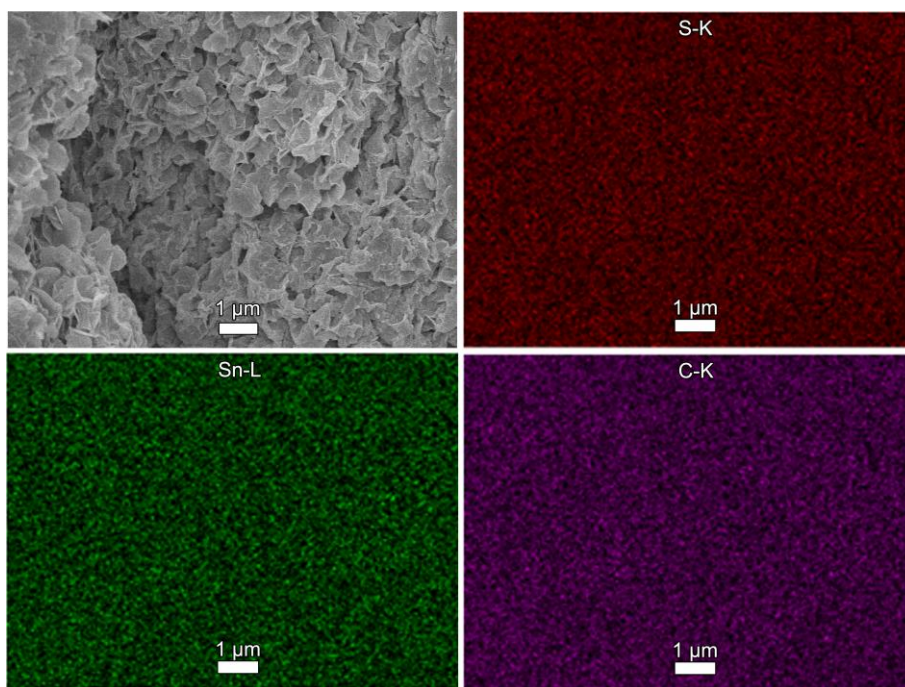

**Fig. S2** SEM EDS mapping images of  $\text{SnS}_2/\text{G-20}$  nanocomposite.

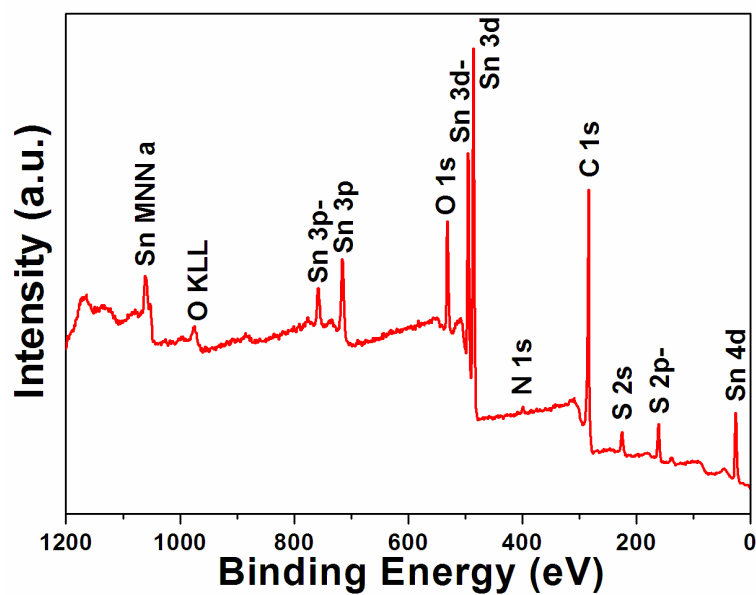

**Fig. S3** Survey XPS spectrum of SnS<sub>2</sub>/G-20 nanocomposite.

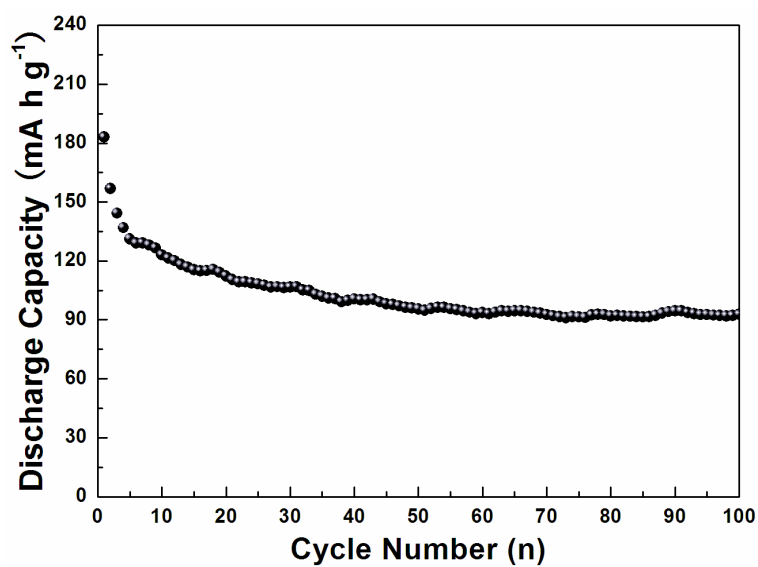

**Fig. S4** Cycling behavior of pure graphene obtained by a hydrothermal method employing GO and NH<sub>2</sub>CSNH<sub>2</sub> as the starting materials (as Na-storage anode, current density = 200 mA g<sup>-1</sup>).
